# Supplementary material for: UV aerosol synthesis: a one-step route to silica, organic-silica and surfactant/silica nanostructured materials
Source: Royal Society of Chemistry journal article supplement (doi:10.1039/c6ra10451g), 2016-01-01
Supplement: c6ra10451g1.pdf [file c6ra10451g1.pdf]

# Supplementary Information

## UV Aerosol Synthesis: a One-Step Route to Silica, Organic-Silica and Surfactant/Silica Nanostructured Materials

Mathilde Sibeaud, Céline Croutxé-Barghorn, Séverinne Rigolet, Laure Michelin, Ludovic Josien, Loïc Vidal, Bénédicte Lebeau, Michael Wörner, Abraham Chemtob

| Formulation                                  | UV irradiation | Result     |
|----------------------------------------------|----------------|------------|
| PDMOS/Acetone (technical) (1/1 wt%)          | Yes            | No outcome |
| PDMOS/PAG/Acetone/Water (1/0.06/1/0.025 wt%) | No             | No outcome |

**Table 1:** Blank experiments performed during the scouting experiments

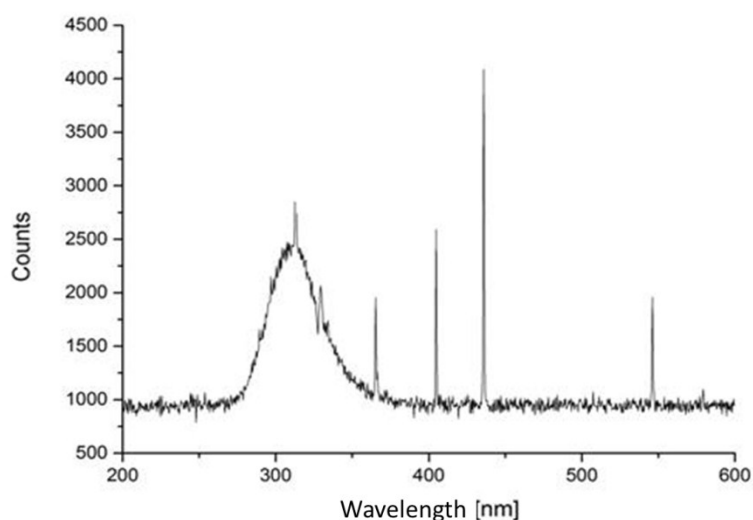

**Figure S1.** Emission spectra of the UV Fluorescent lamps

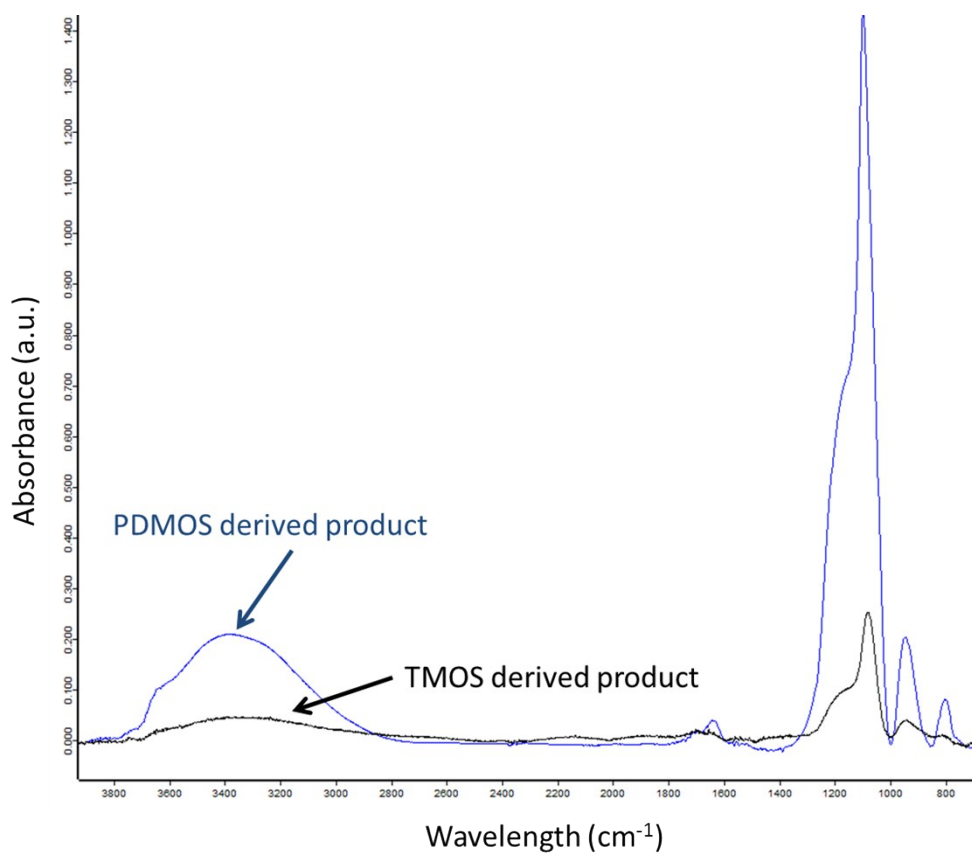

**Figure S2.** FTIR spectra of the PDMOS derived product (run **g**) versus FTIR spectra of the TMOS derived product (run **h**).

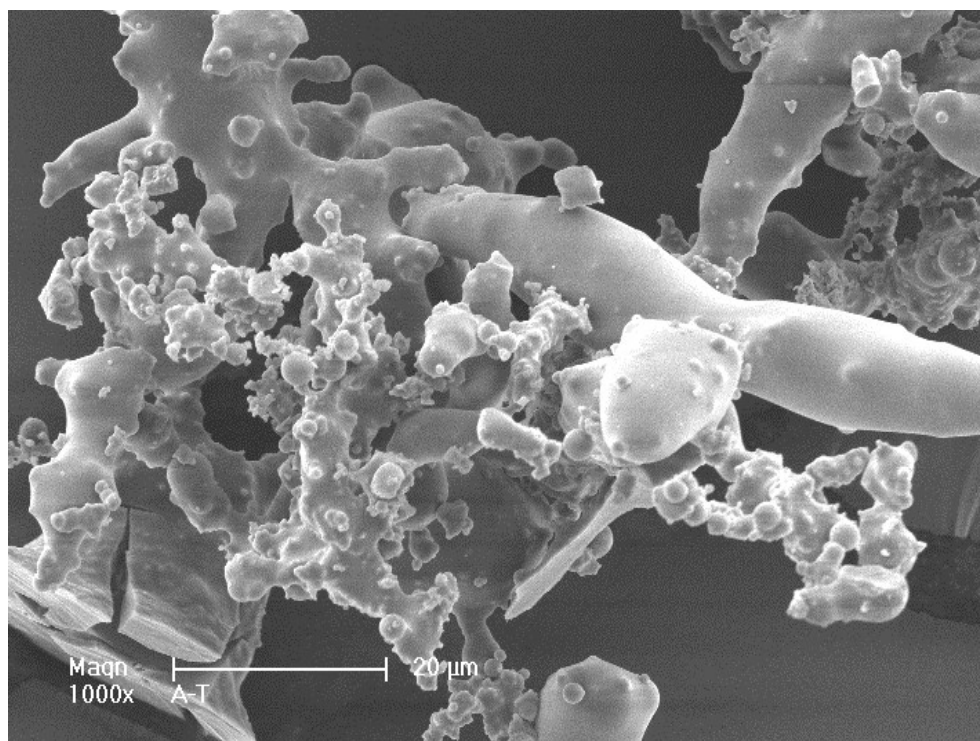

**Figure S3 :** SEM images of SiO<sub>2</sub> nano- and microparticles formed by aerosol sol-gel photopolymerization of TMOS with technical acetone ( run **h**)

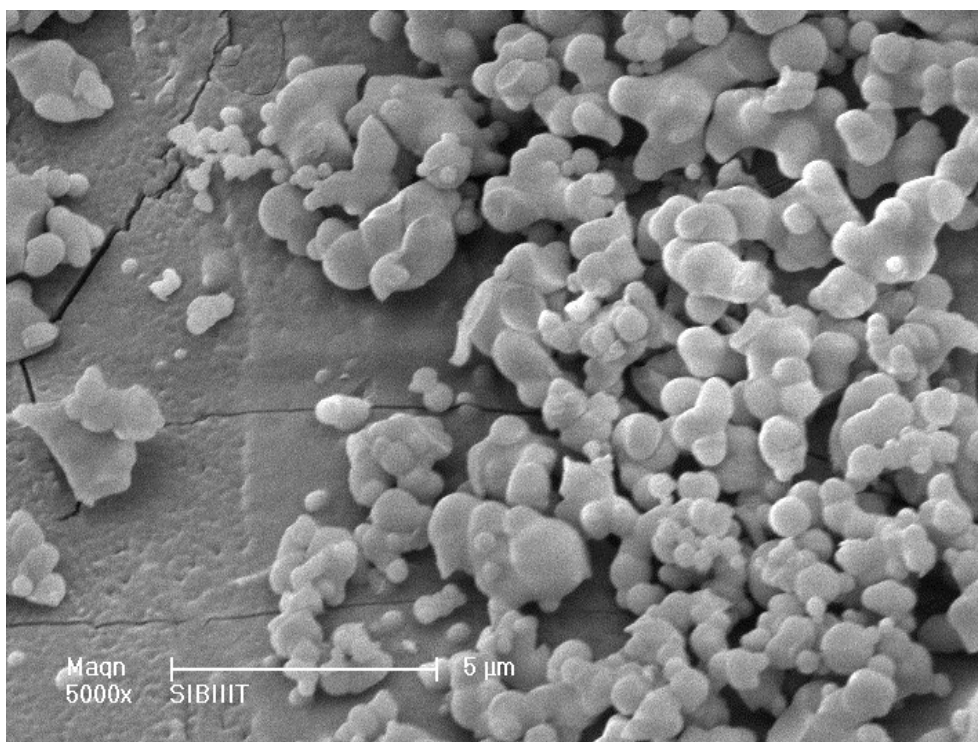

**Figure S4.** SEM images of SiO<sub>2</sub> nano- and microparticles formed by aerosol sol-gel photopolymerization of PDMOS with technical acetone (run g)

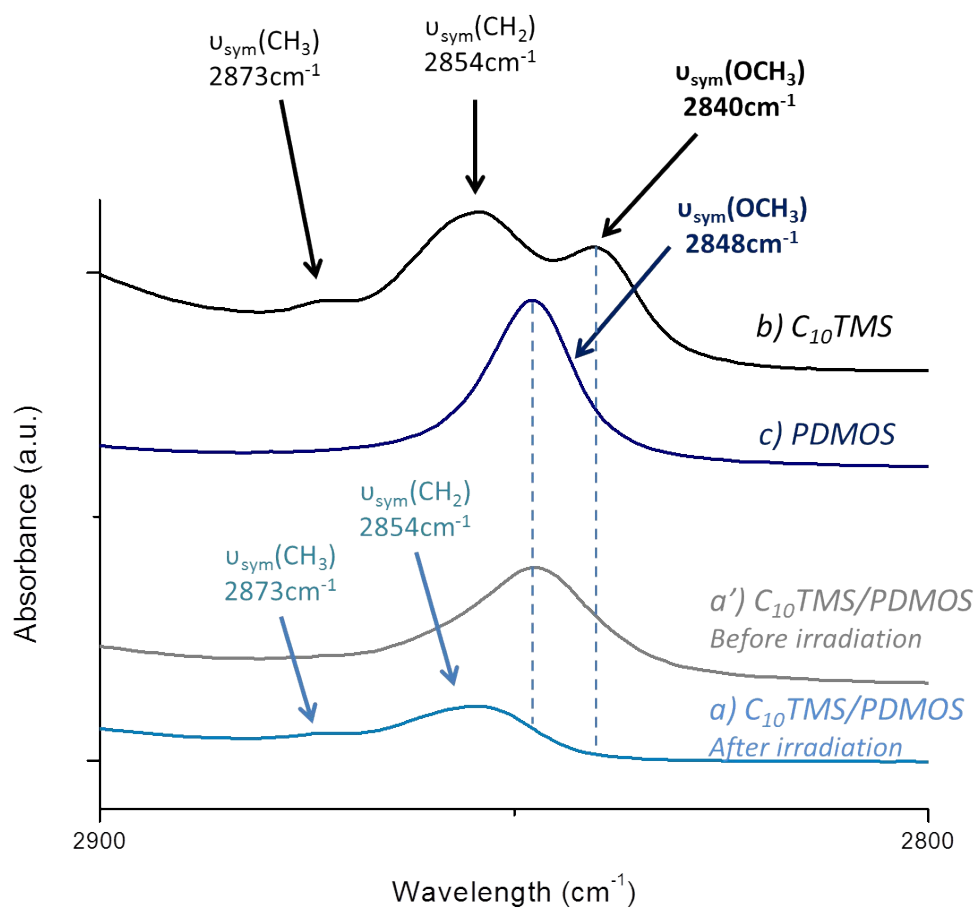

**Figure S5.** FTIR spectra of resulting n-decylpolysilsequioxane (trace a) derived from photopolymerization of precursors PDMOS/C10TMS (trace a'). C<sub>10</sub>TMS (trace b) and PDMOS (trace c) spectra are pictured for comparison.

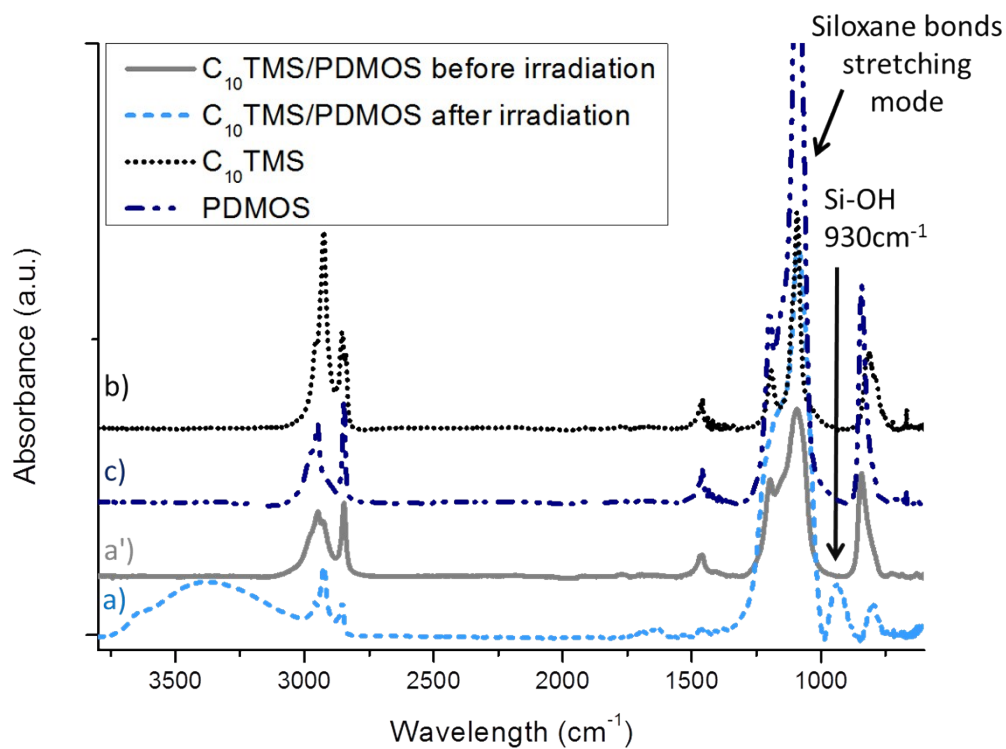

**Figure S6.** FTIR spectra of resulting n-decylpolysilsequioxane (trace **a**) derived from photopolymerization of precursors PDMOS/ $\text{C}_{10}\text{TMS}$  (trace **a'**).  $\text{C}_{10}\text{TMS}$  (trace **b**) and PDMOS (trace **c**) spectra are pictured for comparison.

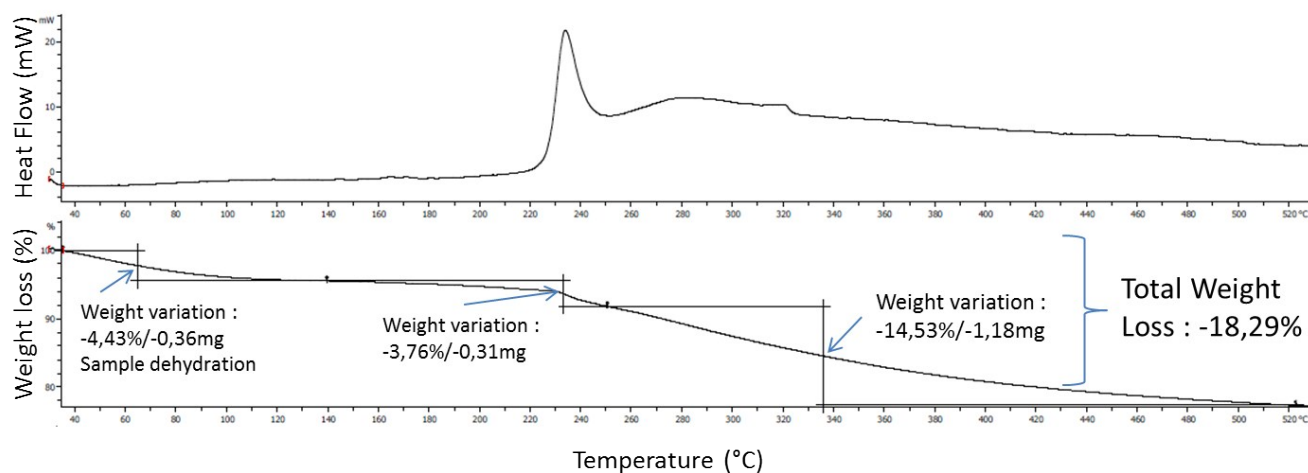

**Figure S7.** TGA data of the n-decylpolysilsequioxane derived from photopolymerization of PDMOS/ $\text{C}_{10}\text{TMS}$  (10 %mol)

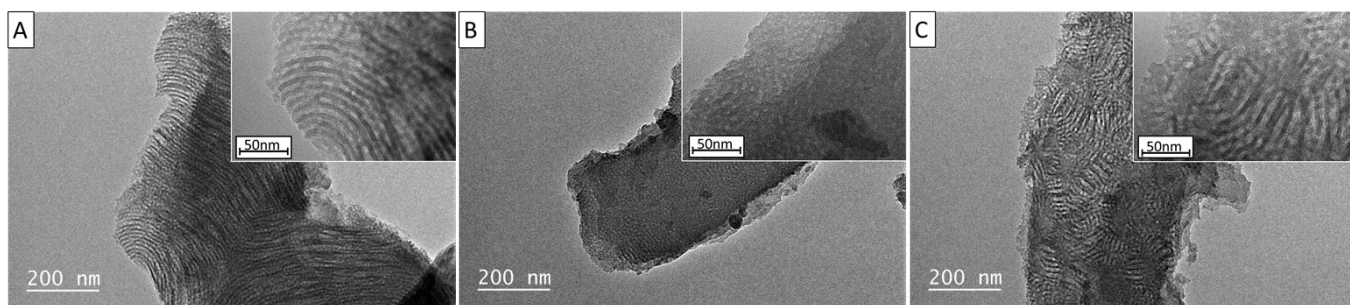

**Figure S8.** TEM pictures of 25wt% (A), 45wt% (B) and 70wt% (C) P123 calcined films

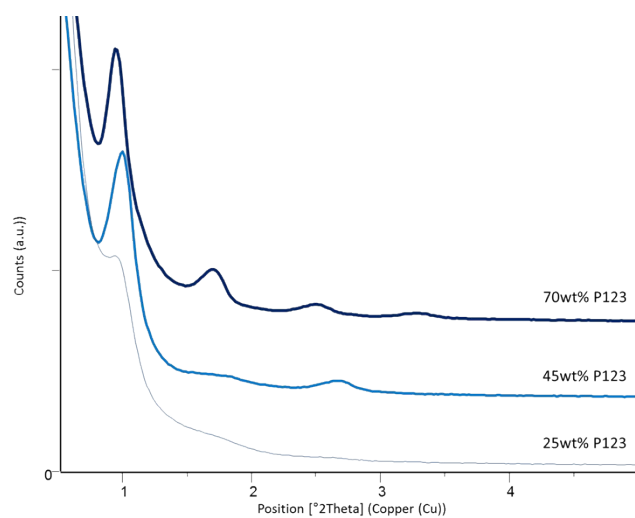

**Figure S9.** XRD pattern at low angles of as synthesized mesoporous films prepared at different P123 concentrations : 25wt%, 45wt% and 70wt%.
